# Supplementary material for: Alcohol-dysregulated microRNAs in hepatitis B virus-related hepatocellular carcinoma
Source: PLOS journal article supplement (doi:10.1371/journal.pone.0178547), 2017-05-31
Supplement: S1 (10.1371/journal.pone.0178547.s001) [file journal.pone.0178547.s001]

**S1 Table**

|                                        |            | <b>nondrinker<br/>HBV+ cohort</b> | <b>drinker<br/>HBV+ cohort</b> |
|----------------------------------------|------------|-----------------------------------|--------------------------------|
| <b>Tumor grade</b>                     | G1         | 7.4%                              | 9.4%                           |
|                                        | G2         | 37.9%                             | 34.4%                          |
|                                        | G3         | 47.4%                             | 50.0%                          |
|                                        | G4         | 7.4%                              | 6.3%                           |
| <b>AJCC staging edition</b>            | 4th        | 1.0%                              | 0.0%                           |
|                                        | 5th        | 7.4%                              | 3.1%                           |
|                                        | 6th        | 44.2%                             | 15.7%                          |
|                                        | 7th        | 47.4%                             | 81.3%                          |
| <b>AJCC tumor pathologic (pT)</b>      | T1         | 58.9%                             | 65.6%                          |
|                                        | T2         | 29.5%                             | 15.6%                          |
|                                        | T3         | 3.2%                              | 3.1%                           |
|                                        | T3a        | 7.4%                              | 9.3%                           |
| <b>AJCC nodes pathologic (pN)</b>      | N0         | 87.3%                             | 87.5%                          |
|                                        | NX         | 12.6%                             | 12.5%                          |
| <b>AJCC metastasis pathologic (pM)</b> | M0         | 91.6%                             | 90.6%                          |
|                                        | MX         | 7.4%                              | 9.4%                           |
| <b>AJCC pathologic tumor stage</b>     | Stage I    | 58.1%                             | 67.7%                          |
|                                        | Stage II   | 29.0%                             | 12.9%                          |
|                                        | Stage IIIA | 8.6%                              | 12.9%                          |
|                                        | Stage IIIB | 0.0%                              | 6.3%                           |
|                                        | Stage IIIC | 2.2%                              | 0.0%                           |
|                                        | Stage IV   | 1.1%                              | 0.0%                           |
